# Supplementary material
Source: PubMed Central journal article supplement (PMC2703552)

Figure S2

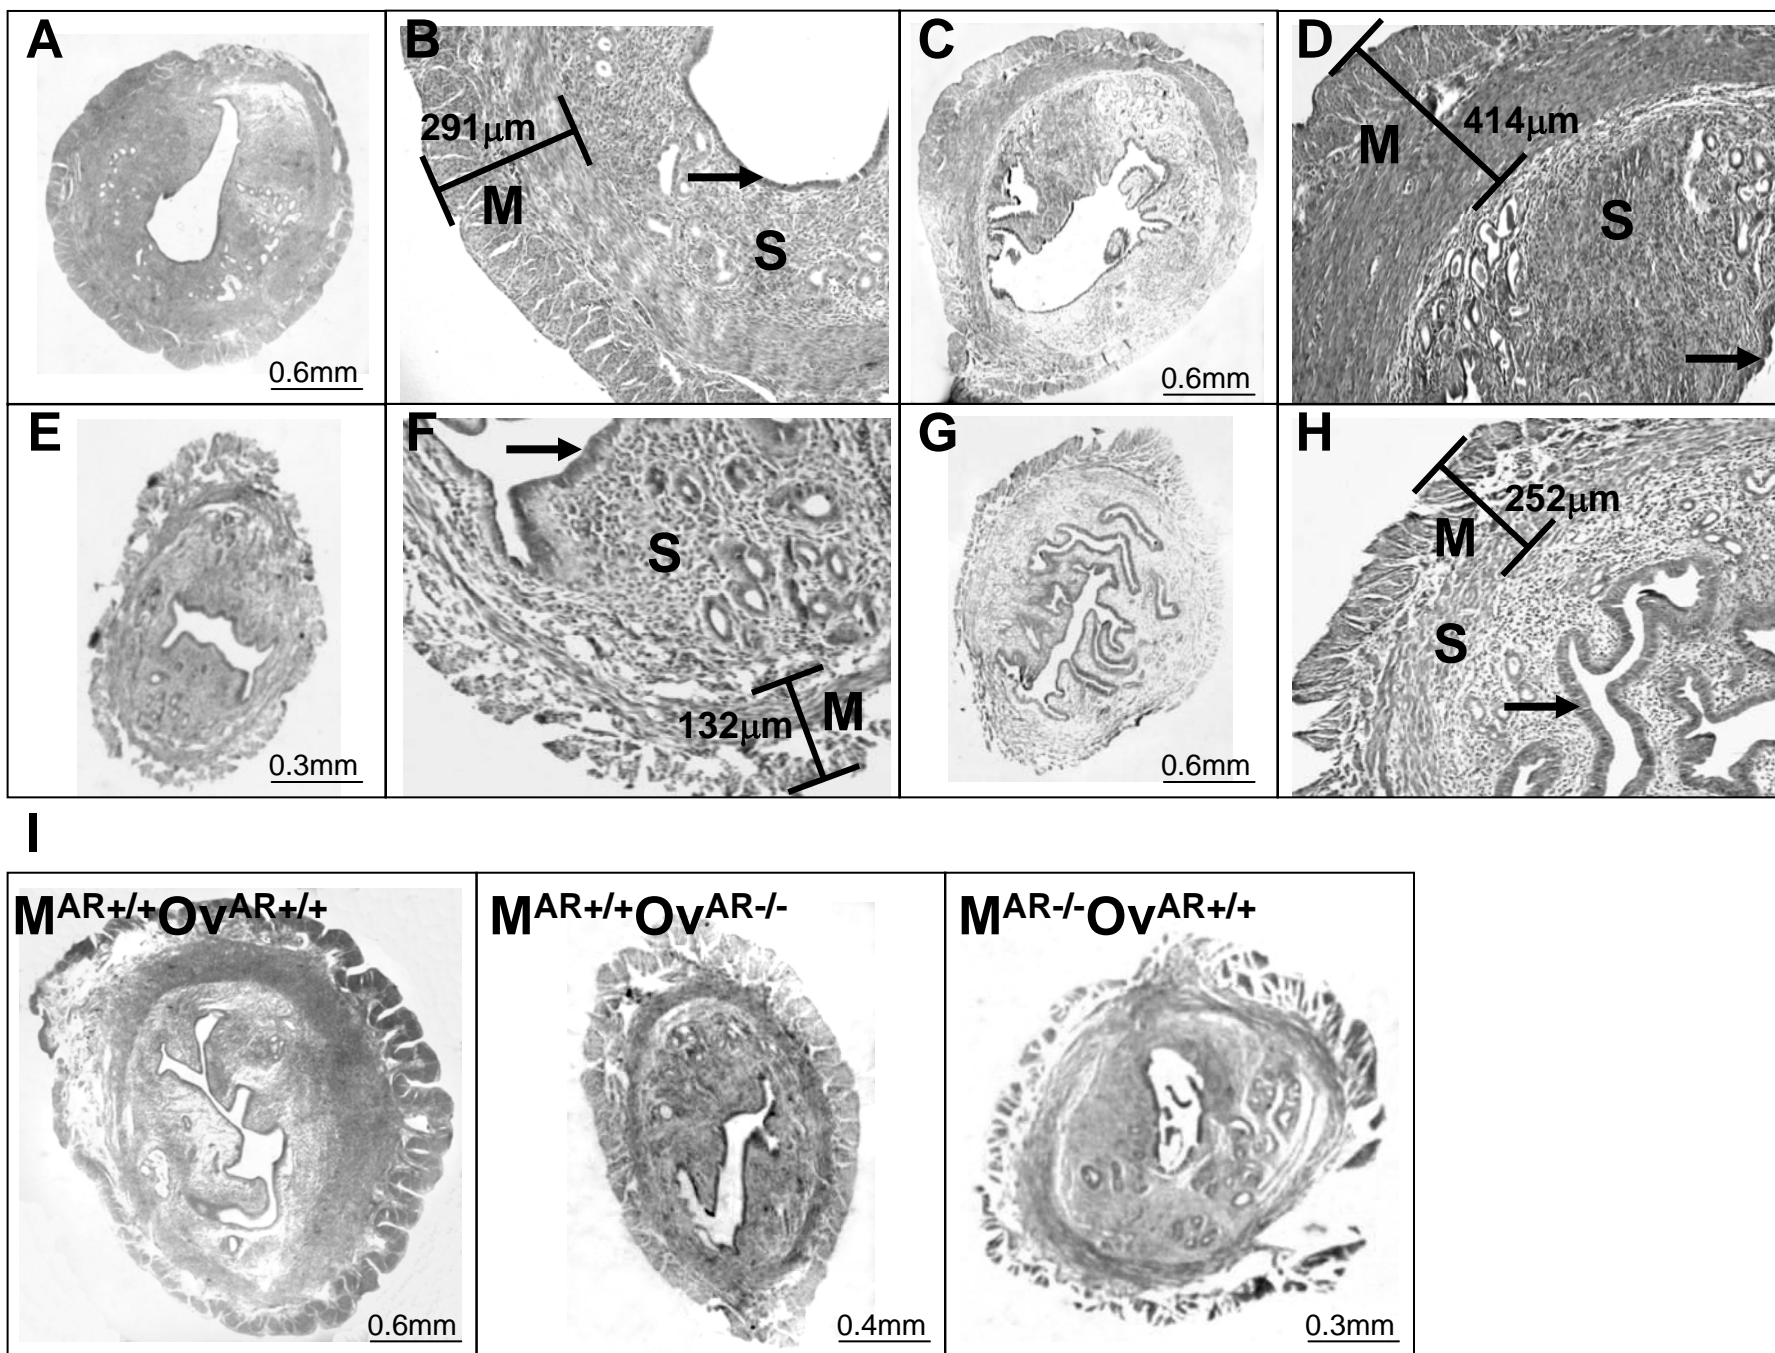

Supplement: en.2008-1750_2.pdf [file en.2008-1750_2.pdf]
